# Supplementary material for: Serum from Older Adults Increases Apoptosis and Molecular Aging Markers in Human Hippocampal Progenitor Cells
Source: PubMed Central journal article supplement (PMC8612606; doi:10.14336/ad.2021.0409), 2021-12-01
Supplement: AD-12-8-2151-s.pdf [file AD-12-8-2151-s.pdf]

## SUPPLEMENTARY DATA

# **Serum from Older Adults Increases Apoptosis and Molecular Ageing Markers in Human Hippocampal Progenitor Cells**

**Chiara de Lucia<sup>1,#</sup>, Tytus Murphy<sup>1,#</sup>, Aleksandra Maruszak<sup>1</sup>, Paul Wright<sup>1</sup>, Timothy R. Powell<sup>2</sup>, Naomi Hartopp<sup>1</sup>, Simone de Jong<sup>2</sup>, Michael J O'Sullivan<sup>1,3</sup>, Gerome Breen<sup>2</sup>, Jack Price<sup>1</sup>, Simon Lovestone<sup>4</sup>, Sandrine Thuret<sup>1\*</sup>**

# SUPPLEMENTARY DATA

## Supplementary Figures

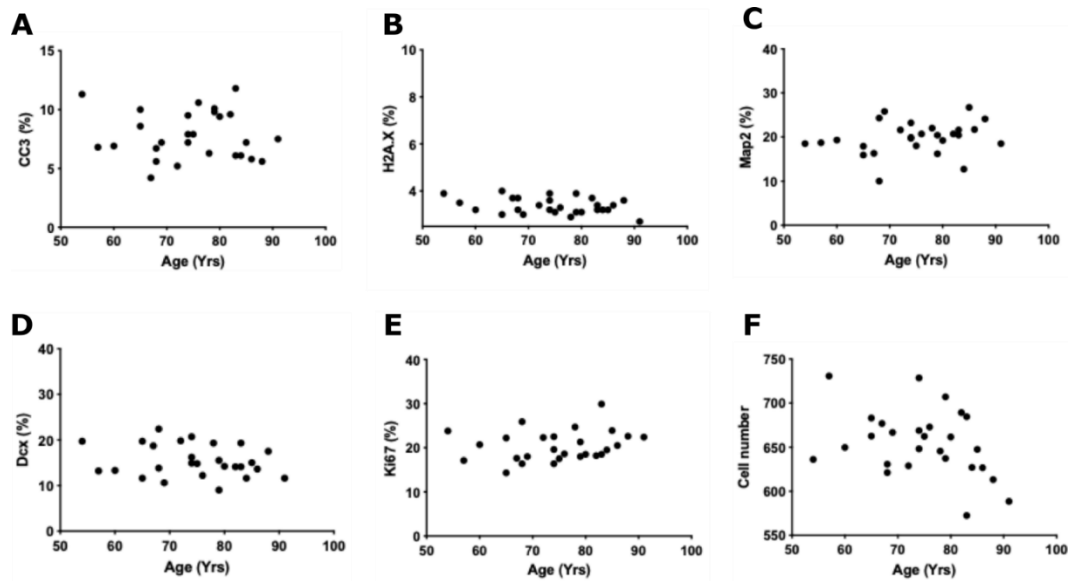

| Cellular readouts       | r     | p value |
|-------------------------|-------|---------|
| Age and CC3%            | -0.05 | 0.82    |
| Age and H2AX%           | -0.26 | 0.20    |
| Age and MAP2%           | 0.31  | 0.12    |
| Age and DCX%            | -0.18 | 0.36    |
| Age and Ki67%           | 0.28  | 0.16    |
| Age and Cells per Field | -0.36 | 0.06    |

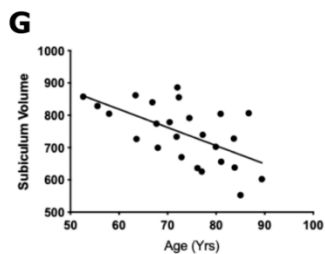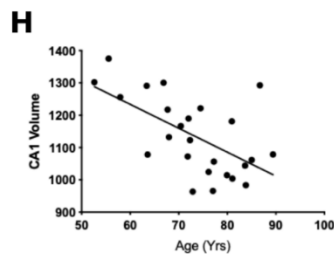

| Age and Subfields Volumes | r            | r <sup>2</sup> | p value            |
|---------------------------|--------------|----------------|--------------------|
| Age and Subiculum         | <b>-0.59</b> | <b>0.36</b>    | <b>0.002*</b>      |
| Age and CA1               | <b>-0.78</b> | <b>0.43</b>    | <b>&lt;0.0001*</b> |

**Supplementary Figure 1. (A-F) Effect of MATOC serum donor's age on cellular markers.** Scatterplots showing the percentage of positive HPC0A07/03A cells following the differentiation assay, for each cellular marker following serum treatment and the corresponding participant's age. Markers for apoptosis (CC3), DNA damage (H2AX), immature neurons (MAP2), neuroblasts (DCX) and proliferation (Ki67) are reported. Also reported is the number of cells per field as a measure of cell density based on the nuclear marker DAPI. Each dot represents a participant. Table reports correlation results of the effect of serum donor's age on cellular markers. r value and p value of each Spearman's correlation assessing the association between each cellular marker and serum donor's age. **(G-H) Effect of age on hippocampal subfield volume.** Scatterplots showing linear regressions assessing the relationship between participant's age in years and hippocampal subfields **(G)** Subiculum, **(H)** CA1. Linear regression line is shown on each graph. Correlation and linear regression results of the effect of age on hippocampal subfield volumes. Table shows the results of correlations and linear regressions testing the association between age and hippocampal volumes. r value following Spearman's correlation and the r<sup>2</sup> and p values following linear regressions are reported. Following Bonferroni correction to account for the 6 multiple comparisons, the significance threshold for this analysis was set to 0.0083. Significant results before correction are in bold. \* denotes results surviving multiple testing correction.

# SUPPLEMENTARY DATA

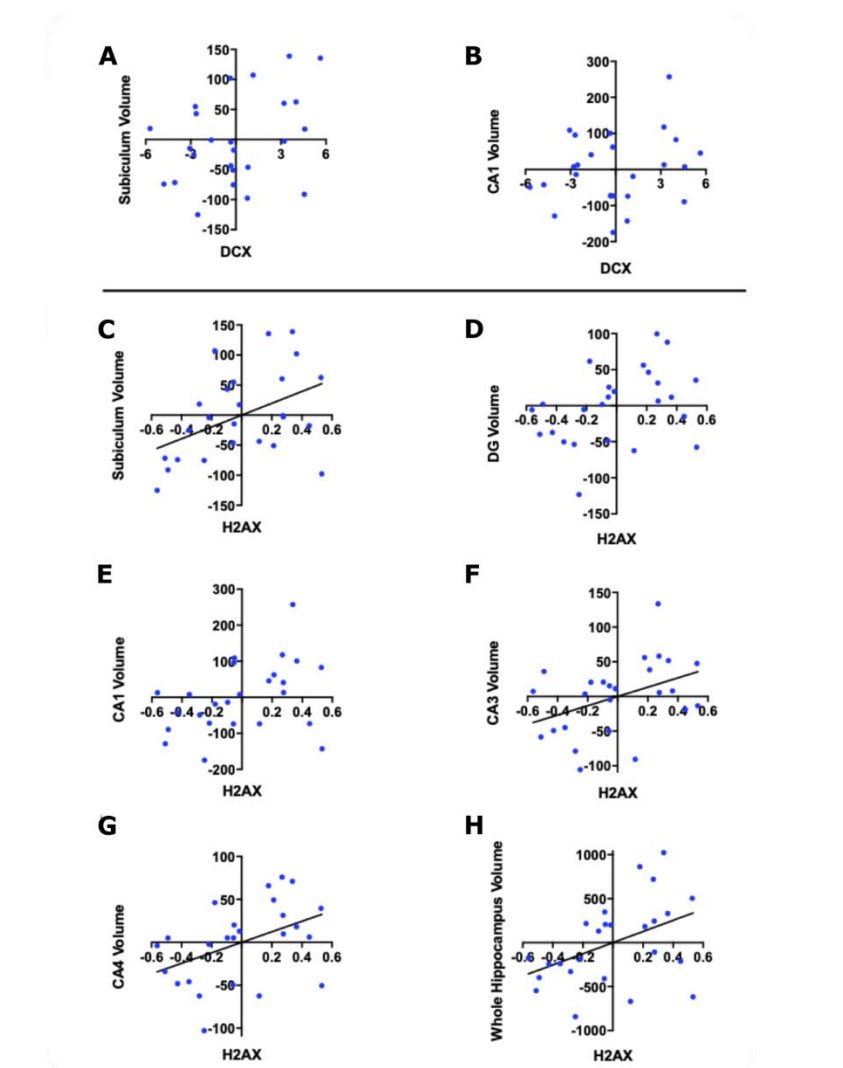

| DCX and Subfield Volumes          | r           | r <sup>2</sup> | p value      |
|-----------------------------------|-------------|----------------|--------------|
| DCX and Subiculum                 | 0.28        | 0.14           | 0.065        |
| DCX and CA1                       | 0.10        | 0.06           | 0.258        |
| H2AX and Subfield Volumes         | r           | r <sup>2</sup> | p value      |
| <b>H2AX and Subiculum</b>         | <b>0.43</b> | <b>0.20</b>    | <b>0.025</b> |
| H2AX and Dentate Gyrus (DG)       | 0.38        | 0.14           | 0.061        |
| H2AX and CA1                      | 0.41        | 0.15           | 0.053        |
| <b>H2AX and CA3</b>               | <b>0.39</b> | <b>0.17</b>    | <b>0.039</b> |
| <b>H2AX and CA4</b>               | <b>0.49</b> | <b>0.19</b>    | <b>0.029</b> |
| <b>H2AX and Whole Hippocampus</b> | <b>0.45</b> | <b>0.19</b>    | <b>0.028</b> |

**Supplementary Figure 2. (A-B) Associations of DNA damage marker to hippocampal subfield volumes.** 1 Scatterplots showing non-significant associations between neuroblasts (DCX expression) following serum incubation and hippocampal volumes. In each graph, the x-axis shows the age-regressed percentage of HPC0A07/03A cells positive for DCX expression, and the y-axis shows the age-regressed volume of the specific hippocampal subfields (A) Subiculum (B) CA1. (C-H) Scatterplots showing the association between DNA damage (H2AX expression) following serum incubation and serum donor's hippocampal volumes. In each graph, the x-axis shows the age-regressed percentage of HPC0A07/03A cells positive for H2AX expression, and the y-axis shows the age-regressed volume of the specific hippocampal subfield. (A) Subiculum, (B) Dentate Gyrus (DG), (C) CA1, (D) CA1, (E) CA4, (F) Whole hippocampus Linear regression line shown in black, graphs with no line indicate non-significant correlation results. **Table** showing correlation and linear regression results for the association of DCX / H2AX to hippocampal subfield volumes. r value following Spearman's correlation and the r<sup>2</sup> and p values following linear regressions are reported. Bonferroni correction was used to account for 36 multiple comparisons (6 subfields and 6 markers), the significance threshold for this analysis was set to 0.0014. Significant results before correction are in bold. No association survived multiple testing correction.

## SUPPLEMENTARY DATA

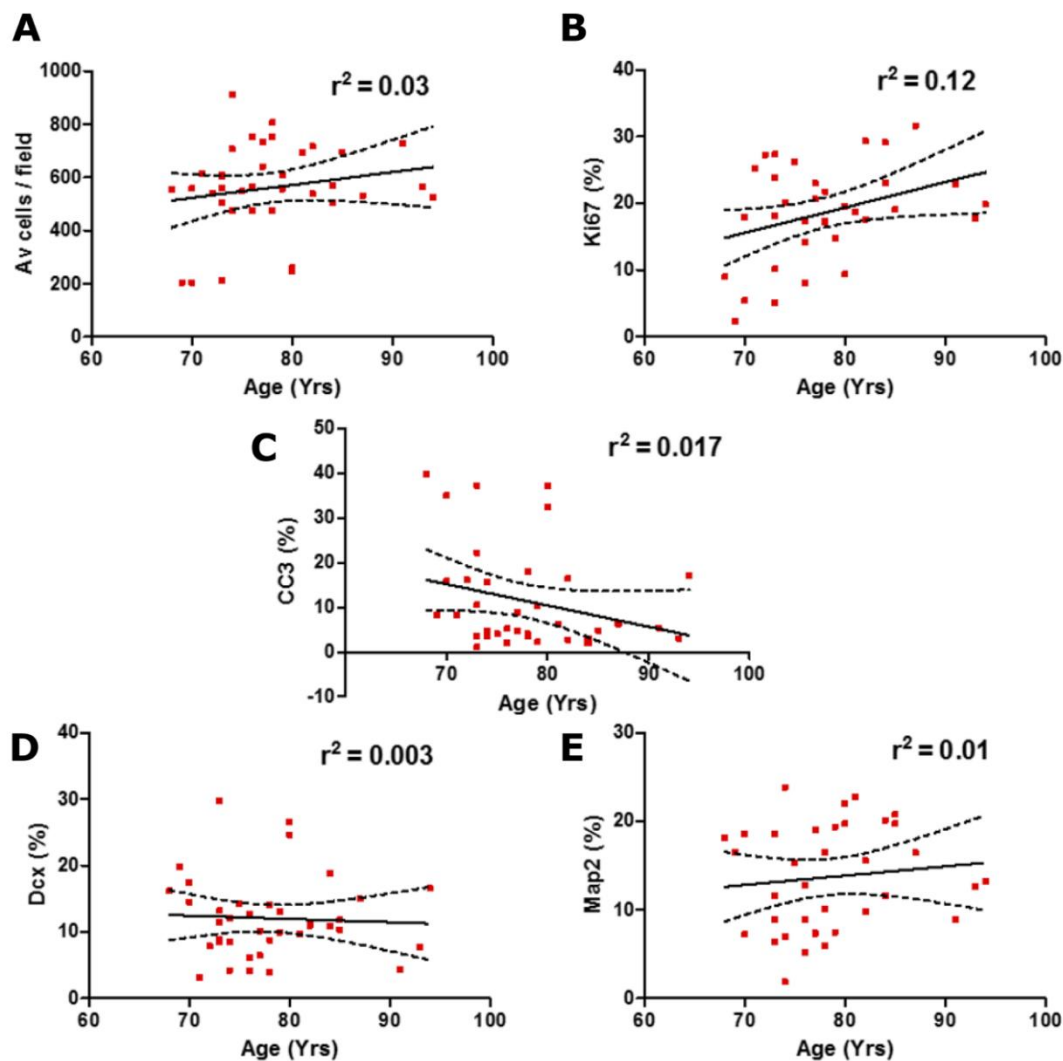

**Supplementary Figure 3. Relationship between age of serum donor and cellular read-outs in the old cohort:** (A) Total number of hippocampal progenitor cells divided by fields counted (B) proliferation, Ki67 (%), (C) apoptotic cell death, CC3 (D) neuroblasts, DCX (%) and (E) immature neurons, Map2 (%) following 9 days of progenitor cell culture with old (red squares) human serum plotted against age of subject. B, C, D and E presented as % of total number of hippocampal progenitor cells,  $n = 3$  technical replicates per sample. Linear and non-linear regression analysis undertaken and values of  $r^2$  presented, dashed lines reflect 95% confidence intervals.

# SUPPLEMENTARY DATA

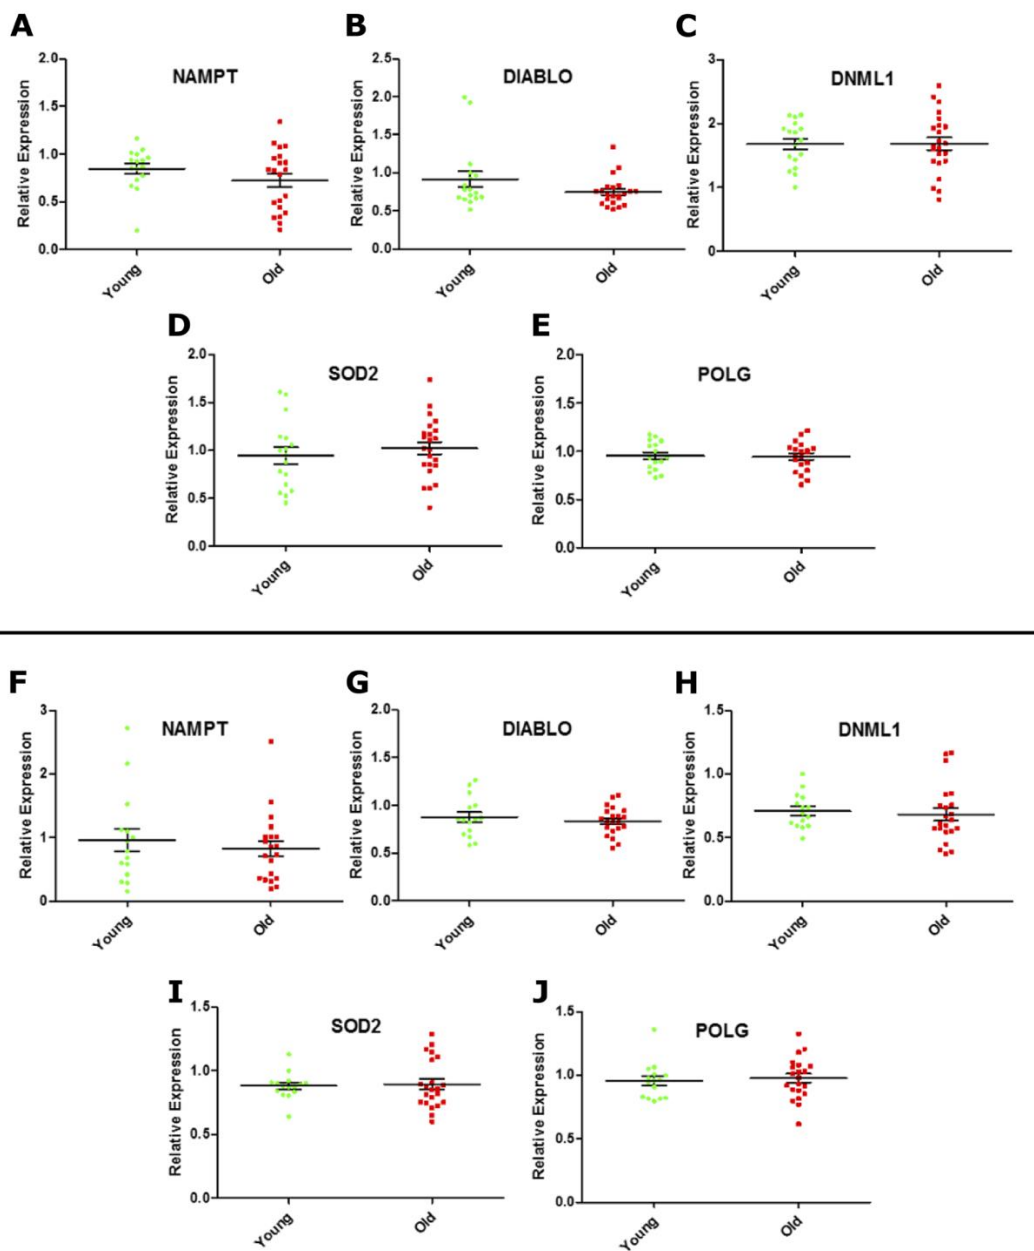

**Supplementary Figure 4. (A-E) Expression of genes involved in mitochondrial function in response to young or old serum at 6 hours differentiation:** relative expression of (A) Nicotinamide phosphoribosyltransferase (NAMPT) (B) DIABLO (C) Dynamin 1-like (DNML1) (D) Superoxide dismutase 2 (SOD2) and (E) DNA polymerase subunit gamma (POLG) normalised to one young subject (21 years), corresponding to 1 on the y axis. Each green circle (young serum, n = 17, mean age of 25.6 years) or red square (old serum, n = 23, mean age of 78 years) represents n = 2 technical replicates following analysis of qPCR data, after 6 hours differentiation of hippocampal progenitors in presence of human serum. Unpaired student and Mann Whitney t-tests as appropriate, error bars = SEM. **(F-J) Expression of genes involved in mitochondrial function in response to young or old serum at 6 days differentiation:** relative expression of (F) Nicotinamide phosphoribosyltransferase (NAMPT) (G) DIABLO (H) Dynamin 1-like (DNML1) (I) Superoxide dismutase 2 (SOD2) and (J) DNA polymerase subunit gamma (POLG) normalised to one young subject (21 years), corresponding to 1 on the y axis. Each green circle (young serum, n = 17, mean age of 25.6 years) or red square (old serum, n = 23, mean age of 78 years) represents n = 2 technical replicates following analysis of qPCR data, after 6 days differentiation of hippocampal progenitors in presence of human serum. Unpaired student and Mann Whitney two-tailed t-tests as appropriate, error bars = SEM.

## SUPPLEMENTARY DATA

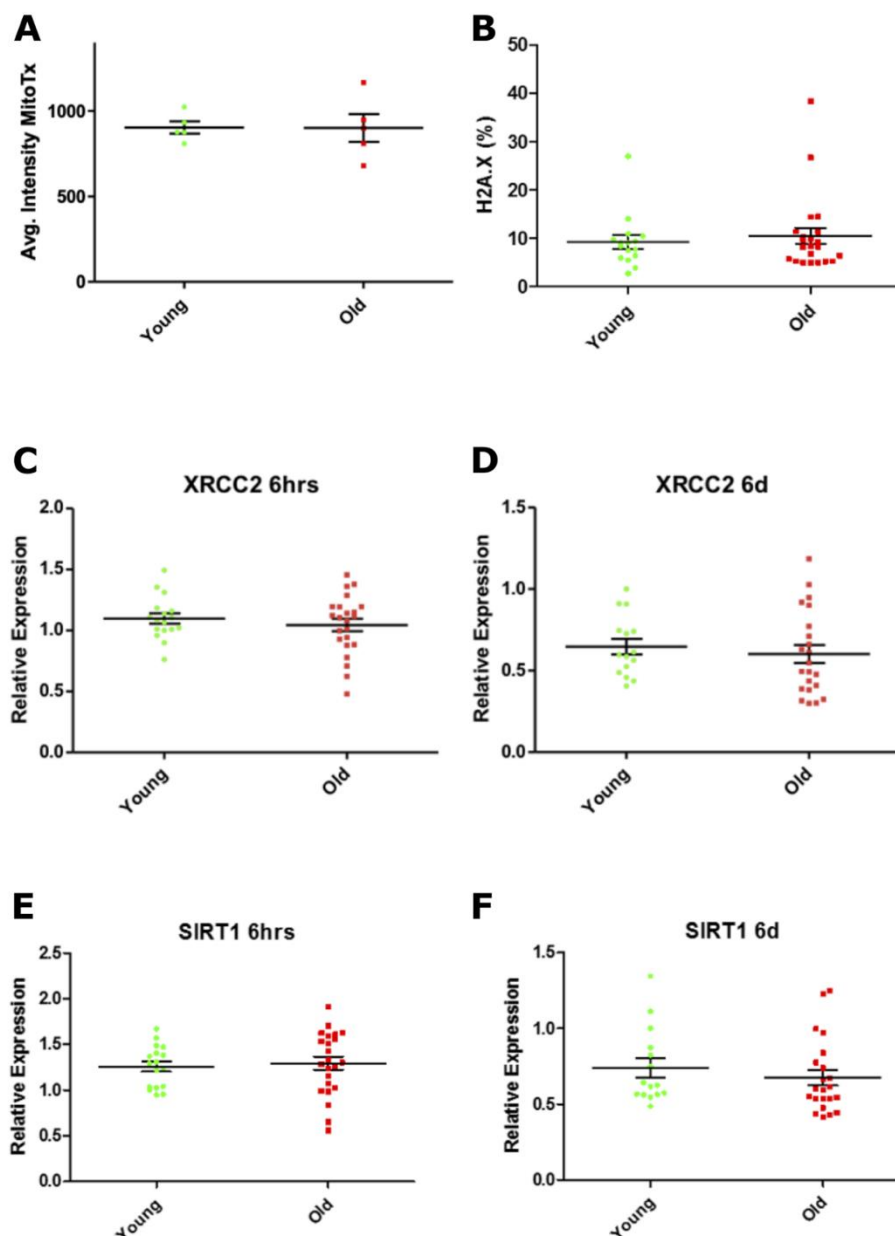

**Supplementary Figure 5. (A) There is no change in the levels of active mitochondria in response to young or old serum:** the levels of active mitochondria in hippocampal progenitor cells were assessed by quantifying the average intensity of MitoTracker (MitoTx) labelling following 7 days of differentiation in the presence of young (n = 5, green circle) or old (n = 5, red square) serum. Increased intensity reflects increased numbers of active mitochondria. n = 3, unpaired student and Mann Whitney two-tailed t-tests as appropriate, error bars = SEM. **(B) The DNA damage marker H2A.X is not altered in response to young or old serum:** H2A.X presented as a % of total number of cells in hippocampal progenitor cells following 7 days of the differentiation in the presence of young (green dot, n = 17, mean age of 25.6 years) or old (red square, n = 23, mean age of 78 years) serum. n = 3 technical replicates per samples, unpaired student and Mann Whitney t-tests as appropriate, error bars = SEM. **(C-D) Expression of genes involved in maintaining genomic integrity following culture with young or old serum at 6 hours and 6 days differentiation:** relative expression of X-ray repair complementing defective repair in Chinese hamster Cells 2 (XRCC2) normalised to one young subject (21 years), corresponding to 1 on the y axis. Each green circle (young serum, n = 17, mean age of 25.6 years) or red square (old serum, n = 23, mean age of 78 years) represents n = 2 technical replicates following analysis of qPCR data, after 6 hrs (hours) (C) or 6 days (D) differentiation of hippocampal progenitors in presence of human serum. Unpaired two-tailed student and Mann-Whitney t-tests as appropriate, \*\* P < 0.01 error bars = SEM. X. **(E-F) Expression of SIRT1 following culture with young or old serum at 6 hours and 6 days differentiation:** relative expression of SIRT1 at (E) 6 hours (hrs) and (F) 6 days (d) normalised to one young subject (21 years), corresponding to 1 on the y axis. Each green circle (young serum, n = 17, mean age of 25.6 years) or red square (old serum, n = 23, mean age of 78 years) represents n = 2 technical replicates following analysis of qPCR data, after 6 hrs (hours) or 6 days (d) differentiation of hippocampal progenitors in the presence of human serum. SIRT1 = Silent mating type information regulation 2 homolog 1. Unpaired student and Mann-Whitney two tailed t-tests as appropriate, error bars = SEM.

# SUPPLEMENTARY DATA

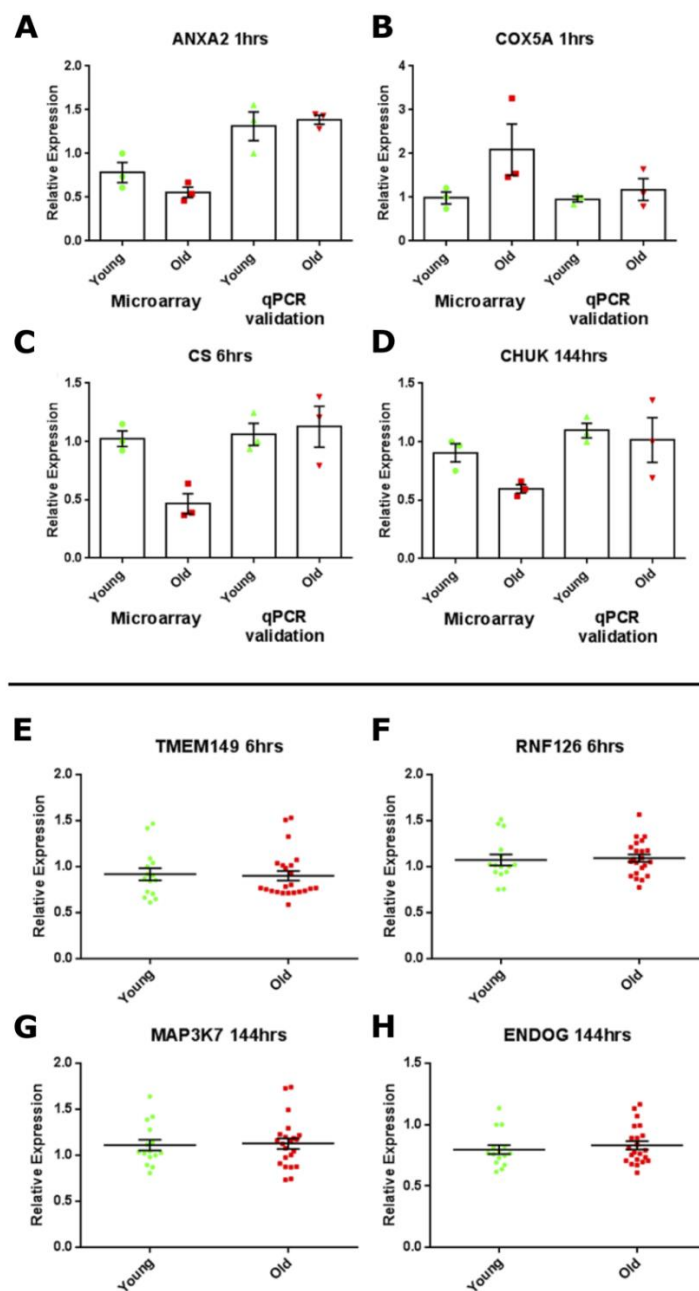

**Supplementary Figure 6. (A-D) Not all candidate genes differentially expressed by young or old serum in the microarray analysis are validated by qPCR:** relative expression of microarray candidates (A) Annexin 2 (ANXA2) (B) cytochrome c oxidase subunit Va (COX5A) (C) citrate synthase (CS) (D) conserved helix-loop-helix ubiquitous kinase (CHUK) normalised to one young-serum induced readout, corresponding to 1 on the y axis for both the microarray and qPCR validation. Each green circle (young, n = 3) or red square (old, n = 3) represents expression values during differentiation of hippocampal progenitors in the presence of human serum at the stated time point. Microarray statistics not included. Unpaired student one-tailed t-test conducted on qPCR data, error bars = SEM. **(E-H) Validation by qPCR of differentially expressed microarray candidates' genes in response to young or old serum:** relative expression of microarray candidates (E) transmembrane 149 (TMEM149) (F) ring finger protein 126 (RNF126) (G) mitogen-activated protein kinase 7 (MAP3K7) (H) endonuclease G (ENDOG) normalised to one young subject (21 years), corresponding to 1 on the y axis. Each green circle (young serum, n = 17, mean age of 25.6 years) or red square (old serum, n = 23, mean age of 78 years) represents n = 2 technical replicates following analysis of qPCR data, after 6 hours or 144 hours differentiation of hippocampal progenitors in presence of human serum. Unpaired student and Mann Whitney two-tailed t-tests as appropriate, error bars = SEM.

## Supplementary Tables:

# SUPPLEMENTARY DATA

**Supplementary Table 1.** Epidemiological factors and cellular data old cohort attached as a separate excel file as part of supplementary materials.

| Sample ID             | Age (yrs) | Gender | Education (yrs) | MMSE | CDR | CERAD | Deterioration | Depression | Waist (cm) | Systolic | Disastolic | Anti-hypertensive | Inflam | Statins |
|-----------------------|-----------|--------|-----------------|------|-----|-------|---------------|------------|------------|----------|------------|-------------------|--------|---------|
| DCR00013              | 82.0      | M      | 21.0            | 30.0 | 0.0 | 9.0   | 1.0           | 2.0        | NA         | 153.0    | 85.0       | 1.0               | 1.0    | 1.0     |
| DCR00045              | 74.0      | M      | 13.0            | 29.0 | 0.0 | 11.0  | 1.0           | 2.0        | 100.5      | 128.0    | 101.0      | 1.0               | 1.0    | 1.0     |
| DCR00051              | 74.0      | F      | 9.0             | 30.0 | 0.0 | 14.0  | 1.0           | 0.0        | 86.0       | 130.0    | 72.0       | NA                | NA     | NA      |
| DCR00091              | 73.0      | F      | 17.0            | 30.0 | NA  | 13.0  | 1.0           | 1.0        | 88.0       | 148.0    | 76.0       | 0.0               | 0.0    | 0.0     |
| DCR00095              | 84.0      | F      | 11.0            | 30.0 | 0.0 | 11.0  | 1.0           | NA         | NA         | NA       | NA         | 1.0               | 0.0    | 0.0     |
| DCR00096              | 82.0      | F      | 14.0            | 29.0 | 0.0 | 11.0  | 1.0           | NA         | NA         | NA       | NA         | NA                | NA     | NA      |
| DCR00099              | 69.0      | F      | 12.0            | 30.0 | NA  | 12.0  | 1.0           | 1.0        | 75.0       | 128.0    | 73.0       | 0.0               | 0.0    | 1.0     |
| DCR00164              | 79.0      | M      | 17.0            | 30.0 | 0.0 | NA    | 2.0           | 1.0        | 104.0      | 157.0    | 74.0       | 0.0               | 1.0    | 1.0     |
| DCR00280              | 94.0      | M      | 11.0            | 30.0 | 0.0 | 6.0   | 2.0           | 4.0        | 93.0       | 164.0    | 84.0       | 1.0               | 1.0    | 1.0     |
| DCR00311              | 75.0      | F      | 12.0            | 30.0 | NA  | 13.0  | 1.0           | 1.0        | 74.0       | 174.0    | 82.0       | NA                | NA     | NA      |
| DCR00320              | 73.0      | F      | 14.0            | 30.0 | NA  | 11.0  | 1.0           | 3.0        | NA         | 117.0    | 76.0       | 1.0               | 1.0    | 0.0     |
| DCR00434              | 70.0      | M      | 15.0            | 29.0 | 0.5 | 14.0  | 2.0           | 2.0        | 93.0       | 139.0    | 77.0       | NA                | NA     | NA      |
| DCR00464              | 73.0      | M      | 10.0            | 28.0 | 0.0 | 7.0   | 1.0           | 1.0        | 82.0       | 152.0    | 90.0       | 0.0               | 1.0    | 0.0     |
| DCR00507              | 77.0      | F      | 11.0            | 30.0 | 0.5 | 8.0   | 2.0           | 3.0        | NA         | NA       | NA         | NA                | NA     | NA      |
| DCR00512              | 91.0      | F      | NA              | 30.0 | NA  | 7.0   | 2.0           | 0.0        | 95.0       | 169.0    | 89.0       | 1.0               | 0.0    | 1.0     |
| DCR00517              | 78.0      | F      | 14.0            | 29.0 | 0.0 | 8.0   | 1.0           | 1.0        | NA         | NA       | NA         | 0.0               | 1.0    | 0.0     |
| DCR00518              | 77.0      | M      | 10.0            | 25.0 | 0.0 | 3.0   | 1.0           | 2.0        | 116.0      | 153.0    | 91.0       | 1.0               | 1.0    | 0.0     |
| DCR00521              | 85.0      | M      | 11.0            | 26.0 | 0.0 | 4.0   | 1.0           | 3.0        | 107.0      | 148.0    | 76.0       | 1.0               | 1.0    | 0.0     |
| DCR00549              | 81.0      | M      | 10.0            | 29.0 | 0.0 | 11.0  | 1.0           | 0.0        | NA         | NA       | NA         | 1.0               | 0.0    | 1.0     |
| DCR00727              | 69.0      | M      | 16.0            | 29.0 | NA  | 10.0  | 1.0           | 4.0        | NA         | NA       | NA         | 0.0               | 0.0    | 0.0     |
| DCR00802              | 71.0      | F      | 16.0            | 27.0 | 0.0 | 9.0   | 1.0           | 0.0        | 96.0       | 154.0    | 89.0       | 1.0               | 1.0    | 0.0     |
| DCR00803              | 72.0      | M      | 28.0            | 30.0 | 0.0 | 14.0  | 1.0           | 0.0        | 86.0       | 128.0    | 73.0       | 1.0               | 0.0    | 0.0     |
| DCR00805              | 73.0      | M      | 15.0            | 30.0 | 0.0 | 6.0   | 2.0           | 0.0        | 90.0       | 149.0    | 93.0       | 1.0               | 0.0    | 0.0     |
| DCR00806              | 80.0      | F      | 6.0             | 27.0 | 0.5 | 8.0   | 1.0           | 5.0        | 91.0       | 133.0    | 69.0       | 0.0               | 1.0    | 0.0     |
| DCR00808              | 80.0      | F      | 10.0            | 29.0 | NA  | 7.0   | 1.0           | 1.0        | 83.0       | 152.0    | 85.0       | 1.0               | 1.0    | 1.0     |
| DCR00819              | 78.0      | M      | 11.0            | 29.0 | 0.5 | 11.0  | 2.0           | 2.0        | 96.0       | 142.0    | 92.0       | 1.0               | 0.0    | 1.0     |
| DCR00824              | 73.0      | F      | 18.0            | 28.0 | NA  | 10.0  | 2.0           | 5.0        | NA         | 144.0    | 81.0       | 1.0               | 0.0    | 1.0     |
| DCR00884              | 70.0      | M      | 11.0            | 28.0 | NA  | 11.0  | 1.0           | 1.0        | 102.0      | 165.0    | 96.0       | 1.0               | 0.0    | 1.0     |
| DCR00892              | 74.0      | F      | 10.0            | 28.0 | NA  | 7.0   | 2.0           | 1.0        | 72.0       | 141.0    | 66.0       | 1.0               | 1.0    | 1.0     |
| LNDCTL059             | 84.0      | F      | 10.0            | NA   | NA  | NA    | NA            | NA         | NA         | NA       | NA         | NA                | NA     | NA      |
| LNDCTL061             | 76.0      | F      | 16.0            | 30.0 | 0.0 | NA    | 1.0           | 0.0        | NA         | NA       | NA         | 0.0               | 1.0    | 0.0     |
| LNDCTL071             | 78.0      | F      | 12.0            | 29.0 | 0.0 | NA    | 1.0           | 2.0        | 93.0       | NA       | NA         | NA                | NA     | NA      |
| LNDCTL076             | 93.0      | F      | 11.0            | 28.0 | 0.5 | NA    | 2.0           | 2.0        | 87.5       | NA       | NA         | 1.0               | 1.0    | 1.0     |
| LNDCTL077             | 76.0      | M      | 16.0            | 29.0 | 0.0 | NA    | 1.0           | 3.0        | NA         | NA       | NA         | 1.0               | 0.0    | 0.0     |
| LNDCTL081             | 79.0      | F      | 15.0            | 29.0 | 0.0 | NA    | 1.0           | 1.0        | 74.0       | NA       | NA         | 0.0               | 1.0    | 0.0     |
| <b>Average</b>        | 77.5      |        | 13.3            | 28.9 |     | 9.0   |               | 1.7        | 90.6       | 146.4    | 82.2       | NA                | NA     | NA      |
| <b>Std. deviation</b> | 6.6       |        | 3.9             | 1.3  |     | 3.0   |               | 1.5        | 11.5       | 14.5     | 8.8        |                   |        |         |



# SUPPLEMENTARY DATA

Supplementary Table 1 Cont.

| Sample ID | Ki67 (%) | Cell Number, Av/field | CC3 (%) | Map2 (%) | Dcx (%) |
|-----------|----------|-----------------------|---------|----------|---------|
| DCR00013  | 17.6     | 718.3                 | 16.4    | 15.6     | 11.0    |
| DCR00045  | 20.1     | 706.7                 | 4.9     | NA       | 4.2     |
| DCR00051  | 20.2     | 910.9                 | 3.7     | 23.9     | 12.1    |
| DCR00091  | 5.1      | 212.2                 | 37.3    | 18.6     | 29.8    |
| DCR00095  | 23.1     | 505.6                 | 2.1     | 20.1     | 18.9    |
| DCR00096  | 29.4     | 539.1                 | 2.8     | 9.8      | 11.4    |
| DCR00099  | 2.3      | 205.7                 | 8.3     | 16.6     | 19.9    |
| DCR00164  | 14.8     | 557.4                 | 10.3    | 7.5      | 10.0    |
| DCR00280  | 19.9     | 524.4                 | 17.1    | 13.2     | 16.6    |
| DCR00311  | 26.3     | 549.8                 | 4.1     | 15.3     | 14.2    |
| DCR00320  | 10.1     | 611.7                 | 1.2     | 11.6     | 8.9     |
| DCR00434  | 5.4      | 204.4                 | 35.0    | 18.6     | 17.5    |
| DCR00464  | 23.9     | 505.8                 | 3.6     | 9.0      | 8.5     |
| DCR00507  | 17.5     | 567.4                 | 2.0     | 12.8     | 12.7    |
| DCR00512  | 22.9     | 730.8                 | 5.5     | 8.9      | 4.5     |
| DCR00517  | 21.8     | 753.6                 | 4.1     | 10.1     | 3.9     |
| DCR00518  | 20.7     | 641.2                 | 8.9     | 19.0     | 10.1    |
| DCR00521  | 19.0     | 695.7                 | 4.9     | 19.7     | 11.9    |
| DCR00549  | 18.7     | 696.6                 | 6.3     | 22.7     | 9.8     |
| DCR00727  | 9.0      | 554.7                 | 39.9    | 18.2     | 16.2    |
| DCR00802  | 25.3     | 614.4                 | 8.2     | NA       | 3.2     |
| DCR00803  | 27.3     | 540.9                 | 16.2    | NA       | 7.9     |
| DCR00805  | 18.2     | 603.7                 | 10.5    | 6.4      | 11.4    |
| DCR00806  | 9.4      | 261.3                 | 37.3    | 19.7     | 24.7    |
| DCR00808  | 19.6     | 246.0                 | 32.4    | 22.0     | 26.5    |
| DCR00819  | 17.1     | 475.5                 | 18.0    | 5.9      | 14.1    |
| DCR00824  | 27.3     | 560.7                 | 22.3    | NA       | 13.2    |
| DCR00884  | 18.0     | 558.8                 | 15.9    | 7.3      | 14.5    |
| DCR00892  | 20.1     | 474.0                 | 15.8    | 7.0      | 8.5     |
| LNDCTL059 | 29.1     | 571.1                 | 3.0     | 11.6     | 10.9    |
| LNDCTL061 | 8.1      | 475.8                 | 5.2     | 5.2      | 4.2     |
| LNDCTL071 | 17.4     | 806.4                 | 3.5     | 16.5     | 8.8     |
| LNDCTL076 | 17.7     | 564.0                 | 3.0     | 12.6     | 7.7     |
| LNDCTL077 | 14.3     | 752.7                 | 2.1     | 8.9      | 6.2     |
| LNDCTL081 | 14.8     | 610.7                 | 2.3     | 19.4     | 13.1    |

Supplementary Table 1 Key

|                   |                                                                                                                           |
|-------------------|---------------------------------------------------------------------------------------------------------------------------|
| NA                | Datapoint not measured during serum sample collection                                                                     |
| NA                | Datapoint removed owing to increased variation among technical replicates                                                 |
| MMSE              | Mini-mental state examination                                                                                             |
| CDR               | Clinical Dementia Rating (0 and 0.5 is cognitively normal)                                                                |
| CERAD             | Consortium to Establish a Registry for Alzheimer's Disease scale (scores closer to 24 reflect more cognitive dysfunction) |
| Deterioration     | Global Deterioration Scale (1 = no cognitive decline, 2 = very mild cognitive decline)                                    |
| Depression        | Geriatric Depression Scale (0-9 = normal affect)                                                                          |
| Anti-hypertensive | 1 = currently taking anti- hypertensive medication, 0 = no medication                                                     |
| Inflam            | 1 = presence of inflammatory disease e.g. arthritis, 0 = no disease                                                       |
| Statins           | 1 = currently taking statins, 0 = no statins. NA = information not available. SD = standard deviation about mean.         |

# SUPPLEMENTARY DATA

**Supplementary Table 2.** Range of anti-hypertensives taken by old subjects.

| <b>Antihypertensive</b>       | <b>Mechanism of action</b>                                                                               |
|-------------------------------|----------------------------------------------------------------------------------------------------------|
| <b>Nifedipine</b>             | Calcium antagonist, vasodilator                                                                          |
| <b>Ramipril</b>               | Angiotensin-converting enzyme inhibitor                                                                  |
| <b>Warfarin</b>               | Anticoagulant                                                                                            |
| <b>Amlodipine</b>             | Calcium channel blocker                                                                                  |
| <b>Aspirin</b>                | Non-steroidal anti-inflammatory drugs                                                                    |
| <b>Natrilix</b>               | Modifies calcium exchange, vasodilating effect                                                           |
| <b>Lyprinol</b>               | Omega 3 fatty acid, anti-inflammatory                                                                    |
| <b>Bisoprolol</b>             | $\beta$ -blocker                                                                                         |
| <b>Isosorbide mononitrate</b> | Vasodilator                                                                                              |
| <b>Furosenide</b>             | A loop diuretic, targets Na-KCL transporter                                                              |
| <b>Digoxin</b>                | Inhibition of the Na <sup>+</sup> /K <sup>+</sup> ATPase, mainly in the myocardium,<br>steady heart rate |
| <b>Enalapril</b>              | Angiotensin-converting enzyme inhibitor                                                                  |
| <b>Doxazosin</b>              | $\alpha$ 1-selective alpha blocker                                                                       |
| <b>Omeprazole</b>             | Proton pump inhibitor, relieve heartburn                                                                 |
| <b>Bendroflumethiazide</b>    | Inhibit sodium absorption, vasodilator                                                                   |

# SUPPLEMENTARY DATA

**Supplementary Table 3.** Full list of target molecular hallmarks of ageing assayed.

| Gene                            |                                                                        | Function                                                                                                                                                                                                                                                                                                                          |
|---------------------------------|------------------------------------------------------------------------|-----------------------------------------------------------------------------------------------------------------------------------------------------------------------------------------------------------------------------------------------------------------------------------------------------------------------------------|
| NAMPT                           | Nicotinamide phosphoribosyltransferase                                 | Catalyses a key intermediate step in the production of nicotinamide adenine dinucleotide (NAD), a key co-factor for enzymes involved in mitochondrial function and metabolism.                                                                                                                                                    |
| DIABLO                          | Diablo homologue                                                       | Mitochondrial protein released into the cytosol during apoptosis.                                                                                                                                                                                                                                                                 |
| DNML1                           | Dynamins 1-like                                                        | Mediates mitochondrial division.                                                                                                                                                                                                                                                                                                  |
| SOD2                            | Superoxide dismutase 2                                                 | Clears mitochondrial Reactive Oxygen Species and so protects against cell death. Upregulated in response to oxidative stress.                                                                                                                                                                                                     |
| POLG                            | -                                                                      | DNA polymerase subunit gamma (POLG) is a catalytic subunit of the mitochondrial enzyme DNA polymerase gamma needed for mitochondrial replication.                                                                                                                                                                                 |
| PARP1                           | Poly ADP-ribose polymerase 1                                           | PARP1 activity is required for genome stability; acts via several different DNA repair pathways.                                                                                                                                                                                                                                  |
| XRCC2                           | X-ray repair complementing defective repair in Chinese hamster Cells 2 | Encodes a member of the RecA/Rad51-related protein that is required for the repair of double stranded DNA breaks by homologous recombination.                                                                                                                                                                                     |
| TERT                            | Telomerase reverse transcriptase                                       | A catalytic subunit of the enzyme telomerase, a key enzyme which maintains the length of telomeres which otherwise shorten following mitosis and is essential for maintaining genome integrity.                                                                                                                                   |
| SIRT1                           | Silent mating type information regulation 2 homolog 1                  | An enzyme that deacetylates proteins involved in cellular stress responses and longevity. Deacetylation is an epigenetic mechanism that regulates gene expression.                                                                                                                                                                |
| UCHL1                           | Ubiquitin carboxyl-terminal esterase L1                                | Neuron-specific enzyme involved in the ubiquitin-proteasome system.                                                                                                                                                                                                                                                               |
| ATF4                            | activating transcription factor 4                                      | Required for autophagy.                                                                                                                                                                                                                                                                                                           |
| ATG5                            | autophagy protein 5                                                    | Required for autophagy.                                                                                                                                                                                                                                                                                                           |
| pS6                             | phosphorylated S6                                                      | Ribosomal protein kinase (S6) is a downstream component of the target of rapamycin complex 1 (TORC1) and functions as a key regulator of autophagy, protein synthesis and cell metabolism.                                                                                                                                        |
| AMPK                            | AMP-activated protein kinase                                           | A highly-conserved regulator of cellular energy homeostasis. This kinase is activated in response to stresses that deplete cellular ATP supplies such as low glucose, hypoxia, ischemia, and heat shock; activation results in both upregulation of catabolic processes to generate more ATP and inhibition of anabolic pathways. |
| AKT                             | Protein Kinase B                                                       | conserved kinase that regulates glucose metabolism and other key cellular processes such as growth-factor mediated proliferation and apoptosis                                                                                                                                                                                    |
| CDKN2A/p16 <sup>Ink4a</sup>     | Cyclin-dependent kinase inhibitor 2A                                   | Encodes key proteins that regulate the cell cycle.                                                                                                                                                                                                                                                                                |
| CDKN1A/p21 <sup>Cip1/Waf1</sup> | cyclin-dependent kinase inhibitor 1A                                   | Encodes key proteins that regulate the cell cycle.                                                                                                                                                                                                                                                                                |
| CDKN2B/p15 <sup>Ink-4b</sup>    | cyclin-dependent kinase inhibitor 2B                                   | Encodes key proteins that regulate the cell cycle.                                                                                                                                                                                                                                                                                |
| TP53                            | tumour protein 53                                                      | Encodes key proteins that regulate the cell cycle.                                                                                                                                                                                                                                                                                |
| FADD                            | Fas-associated protein with death domain                               | Adaptor protein that links TNF $\alpha$ signalling to apoptosis.                                                                                                                                                                                                                                                                  |
| TNFR1                           | Tumour necrosis factor receptor 1                                      | Binds TNF $\alpha$ and mediates both activation of the transcription factor nuclear factor kappa-light-chain- enhance of activated B cells (NF- $\kappa$ B) and apoptosis.                                                                                                                                                        |
| NF- $\kappa$ B                  | Nuclear factor kappa-light-chain-enhancer of activated B cells         | Controls transcription, cytokine production and cell survival.                                                                                                                                                                                                                                                                    |

# SUPPLEMENTARY DATA

**Supplementary Table 4.** Candidate list of genes returned by young versus old analysis of microarray data attached as a separate excel file as part of supplementary materials.

| Rank | Gene Name           | P Value  | Rank | Gene Name        | P Value  |
|------|---------------------|----------|------|------------------|----------|
| 1    | <b>ISCA1L</b>       | 0.000065 | 71   | <b>SPATA7</b>    | 0.005144 |
| 2    | <b>ANXA2</b>        | 0.000144 | 72   | <b>SPC25</b>     | 0.005170 |
| 3    | <b>HS.544736</b>    | 0.000157 | 73   | <b>CHUK</b>      | 0.005194 |
| 4    | <b>ATP6AP1</b>      | 0.000383 | 74   | <b>LOC441155</b> | 0.005257 |
| 5    | <b>ARPP19</b>       | 0.000398 | 75   | <b>LOC727935</b> | 0.005390 |
| 6    | <b>HS.564949</b>    | 0.000434 | 76   | <b>SLC19A3</b>   | 0.005411 |
| 7    | <b>PFTK1</b>        | 0.000499 | 77   | <b>PPIL5</b>     | 0.005527 |
| 8    | <b>LOC100130446</b> | 0.000567 | 78   | <b>EIF2S2</b>    | 0.005663 |
| 9    | <b>C7ORF47</b>      | 0.000605 | 79   | <b>CCDC97</b>    | 0.005665 |
| 10   | <b>TUBB</b>         | 0.000643 | 80   | <b>TDRD7</b>     | 0.005723 |
| 11   | <b>LOC643319</b>    | 0.000724 | 81   | <b>FAM50B</b>    | 0.005760 |
| 12   | <b>LOC652161</b>    | 0.000823 | 82   | <b>VHL</b>       | 0.005808 |
| 13   | <b>HS.280461</b>    | 0.001002 | 83   | <b>THUMPD2</b>   | 0.005892 |
| 14   | <b>ASAP2</b>        | 0.001036 | 84   | <b>TNFRSF12A</b> | 0.005940 |
| 15   | <b>PPAP2A</b>       | 0.001079 | 85   | <b>LOC401233</b> | 0.005966 |
| 16   | <b>ABTB1</b>        | 0.001172 | 86   | <b>LOC645605</b> | 0.005977 |
| 17   | <b>TMEM149</b>      | 0.001187 | 87   | <b>CCDC12</b>    | 0.006085 |
| 18   | <b>ZC4H2</b>        | 0.001199 | 88   | <b>TTC12</b>     | 0.006128 |
| 19   | <b>C3ORF72</b>      | 0.001283 | 89   | <b>SCARNA27</b>  | 0.006142 |
| 20   | <b>ZNF264</b>       | 0.001298 | 90   | <b>HS.254006</b> | 0.006238 |
| 21   | <b>IFIT3</b>        | 0.001302 | 91   | <b>POLM</b>      | 0.006310 |
| 22   | <b>ZMYM2</b>        | 0.001335 | 92   | <b>PYCR2</b>     | 0.006318 |
| 23   | <b>ZDHHC6</b>       | 0.001368 | 93   | <b>HS.539591</b> | 0.006343 |
| 24   | <b>HS.187499</b>    | 0.001457 | 94   | <b>MTMR12</b>    | 0.006403 |
| 25   | <b>HS.565209</b>    | 0.001604 | 95   | <b>TRAF6</b>     | 0.006667 |
| 26   | <b>ENDOG</b>        | 0.001670 | 96   | <b>LOC728142</b> | 0.006734 |
| 27   | <b>OTUD4</b>        | 0.001697 | 97   | <b>RBMS1</b>     | 0.006770 |
| 28   | <b>PRDX3</b>        | 0.001814 | 98   | <b>HLA-DPB1</b>  | 0.006819 |
| 29   | <b>TRIM45</b>       | 0.001920 | 99   | <b>DCTPP1</b>    | 0.006906 |
| 30   | <b>VARS</b>         | 0.001989 | 100  | <b>LOC732381</b> | 0.006925 |
| 31   | <b>LCN1L1</b>       | 0.002010 | 101  | <b>LOC644096</b> | 0.006980 |
| 32   | <b>FOXI3</b>        | 0.002061 | 102  | <b>BATF3</b>     | 0.007178 |
| 33   | <b>WDR89</b>        | 0.002172 | 103  | <b>HS6ST2</b>    | 0.007260 |
| 34   | <b>C9ORF116</b>     | 0.002285 | 104  | <b>PHF6</b>      | 0.007367 |
| 35   | <b>KCTD12</b>       | 0.002302 | 105  | <b>LOC729417</b> | 0.007423 |
| 36   | <b>ANKRD33</b>      | 0.002414 | 106  | <b>LMF2</b>      | 0.007475 |
| 37   | <b>GNS</b>          | 0.002435 | 107  | <b>IARS</b>      | 0.007560 |
| 38   | <b>PDCD10</b>       | 0.002544 | 108  | <b>MIPEP</b>     | 0.007615 |
| 39   | <b>KIAA1128</b>     | 0.002550 | 109  | <b>MRPS24</b>    | 0.007669 |
| 40   | <b>ABI2</b>         | 0.002580 | 110  | <b>ARL3</b>      | 0.007739 |
| 41   | <b>WDR7</b>         | 0.002591 | 111  | <b>HS.47995</b>  | 0.007858 |
| 42   | <b>NDUFA13</b>      | 0.002701 | 112  | <b>EEF1E1</b>    | 0.007864 |
| 43   | <b>ATP9B</b>        | 0.002701 | 113  | <b>MGC35361</b>  | 0.007917 |
| 44   | <b>COL4A1</b>       | 0.002757 | 114  | <b>COLQ</b>      | 0.007950 |
| 45   | <b>BRP44L</b>       | 0.002768 | 115  | <b>GRN</b>       | 0.008218 |
| 46   | <b>PSMB10</b>       | 0.002900 | 116  | <b>MAP7D2</b>    | 0.008389 |
| 47   | <b>CASC4</b>        | 0.003074 | 117  | <b>LOC643287</b> | 0.008420 |
| 48   | <b>MAP3K7</b>       | 0.003170 | 118  | <b>RB1</b>       | 0.008452 |
| 49   | <b>SDCCAG3</b>      | 0.003212 | 119  | <b>CALHM2</b>    | 0.008476 |

## SUPPLEMENTARY DATA

|    |                  |          |     |                     |          |
|----|------------------|----------|-----|---------------------|----------|
| 50 | <b>HS.296031</b> | 0.003567 | 120 | <b>MRPL34</b>       | 0.008563 |
| 51 | <b>CTSD</b>      | 0.003651 | 121 | <b>TSTD2</b>        | 0.008704 |
| 52 | <b>C22ORF36</b>  | 0.003754 | 122 | <b>HS.581662</b>    | 0.008708 |
| 53 | <b>HS.567759</b> | 0.004087 | 123 | <b>LOC100128476</b> | 0.008762 |
| 54 | <b>LOC148413</b> | 0.004101 | 124 | <b>FAM65A</b>       | 0.008805 |
| 55 | <b>ASF1A</b>     | 0.004197 | 125 | <b>AMD1</b>         | 0.008818 |
| 56 | <b>RNF126</b>    | 0.004209 | 126 | <b>LOC644745</b>    | 0.008871 |
| 57 | <b>ZFP91</b>     | 0.004319 | 127 | <b>KILLIN</b>       | 0.008877 |
| 58 | <b>DDX19B</b>    | 0.004433 | 128 | <b>USP12</b>        | 0.008972 |
| 59 | <b>IP6K1</b>     | 0.004526 | 129 | <b>LOC441054</b>    | 0.009006 |
| 60 | <b>COX5A</b>     | 0.004551 | 130 | <b>RPL23AP7</b>     | 0.009076 |
| 61 | <b>C8ORF44</b>   | 0.004610 | 131 | <b>PDE12</b>        | 0.009084 |
| 62 | <b>SNX12</b>     | 0.004656 | 132 | <b>TULP3</b>        | 0.009096 |
| 63 | <b>MRT04</b>     | 0.004785 | 133 | <b>TUBA1C</b>       | 0.009235 |
| 64 | <b>HSPA2</b>     | 0.004823 | 134 | <b>CRTAP</b>        | 0.009265 |
| 65 | <b>CS</b>        | 0.004851 | 135 | <b>MLL5</b>         | 0.009288 |
| 66 | <b>ATP5EP2</b>   | 0.004941 | 136 | <b>SNF8</b>         | 0.009325 |
| 67 | <b>CYB5R3</b>    | 0.004952 | 137 | <b>SFRS3</b>        | 0.009338 |
| 68 | <b>OR1L8</b>     | 0.005021 | 138 | <b>PDE8B</b>        | 0.009347 |
| 69 | <b>LRFN1</b>     | 0.005038 | 139 | <b>LOC100129243</b> | 0.009429 |
| 70 | <b>SRRM2</b>     | 0.005066 | 140 | <b>LOC727849</b>    | 0.009531 |
|    |                  |          | 141 | <b>APBA3</b>        | 0.009651 |

P value refers to magnitude of differential expression in response to young or old serum at either the 1, 6, 24, 72 or 144 time point during differentiation. 141 genes with a P value < 0.01, uncorrected for multiple comparisons.

**Supplementary Table 5.** List of primary antibodies.

| Antibody<br>(Host species / company)       | Dilution           | Function                                                                                                                                                                                      |
|--------------------------------------------|--------------------|-----------------------------------------------------------------------------------------------------------------------------------------------------------------------------------------------|
| BrdU (Rat /<br>OBT0030CX, Serotech)        | 1:500              | Synthetic analog of thymidine, labels proliferating cells during DNA replication                                                                                                              |
| Ki67<br>(Rabbit / Ab15580, Abcam)          | 1: 500             | Present during all active phases of the cell cycle (G1, S, G2, and mitosis) but absent from resting cells (G0)                                                                                |
| CC3 (Rabbit /<br>9664, Cell Signaling)     | 1: 500             | Cleaved Caspase 3 is a critical executioner of apoptosis                                                                                                                                      |
| Sox2 (Rabbit /<br>Ab5603, Abcam)           | 1: 500             | A transcription factor essential for maintaining self-renewal and maintenance of neural stem cells                                                                                            |
| Nestin (Mouse /<br>Mab5326, EMD Millipore) | 1:1000             | Intermediate filament protein and widely employed marker of neural stem cells                                                                                                                 |
| H2A.X (Mouse /<br>05-636-I, EMD Millipore) | 1:500              | A variant histone required for checkpoint-mediated cell cycle arrest and DNA repair following double-stranded DNA breaks                                                                      |
| Dcx (Rabbit /<br>Ab11267, Abcam)           | 1:500              | Doublecortin is a microtubule-associated protein expressed by neuronal precursor cells and immature neurons in embryonic and adult cortical structures.                                       |
| Map2 (Mouse /<br>Ab11267, Abcam)           | 1: 500             | Microtubule associated protein 2 is involved in microtubule assembly. The products of similar genes in rat and mouse are neuron-specific cytoskeletal proteins and are enriched in dendrites. |
| S100 $\beta$ (Rabbit /<br>Z0311, DAKO)     | 1:1000 -<br>10,000 | S100 calcium-binding protein B is expressed primarily by astrocytes and acts as a neurotrophic factor and neuronal survival protein                                                           |

# SUPPLEMENTARY DATA

**Supplementary Table 6.** Primer sequences for target genes.

| Target gene | Forward (5' to 3')       | Reverse (5' to 3')         |
|-------------|--------------------------|----------------------------|
| PARP-1      | CTGGAGAGAGATTCTGTTGCATAG | GGAAACCAGTAAGGCAGACAT      |
| SIRT-1      | GCAGTGTGAGTAGAAGGAAGTC   | TCCTGAAATTCTTAGCACCAAGT    |
| NAMPT       | CAGAGCTCCCAGACTGC        | CGTTGCTTAAGTCACTGCTC       |
| PUMA        | GTGACCACTGGCATTCAATTTG   | TCCTCCCTCTCCGAGATTT        |
| DIABLO      | CTGAGGCCAAGGAGTGAAA      | CTGTTGATGTTAAGTCCTGTTGAG   |
| TNFR1       | CCGCCTACTTGGTGCTAAC      | GTCCCTCATCTCGCAAAC         |
| FADD        | TCTCCTCTCTGAGACTGCTAAG   | AGAGAGTGCTGTGTGTCAATC      |
| DNM1L       | GCCATAGTCTCCAAGAAGAAA    | AGGACAGGTGGAATACAATGAC     |
| SOD2        | GGATTGATGTGTGGGAGCA      | CTCCCAGTTGATTACATTCCAAATAG |
| POLG        | CCTACAAGCTGGGTCTGAATG    | AATCCATGGTCACTTCCTTCC      |
| ATP5EP2     | GGACTCAGCTACATCCGATACT   | TTACGCTGTTGCCAGAAGTC       |
| NDUFA13     | CACGGCTTCATGTGGTACA      | CCAGGTCTGCAGAGCATTTA       |
| CDKN2A      | GCACATTCATGTGGGCATTT     | GACTCAAGAGAAGCCAGTAACC     |
| CDKN1A      | CCAGCCTCTGGCATTAGAATTA   | CGGGATGAGGAGGCTTTAAATA     |
| TP53        | AGGGATGTTTGGGAGATGTAAG   | CCTGGTTAGTACGGTGAAGTG      |
| CDKN2D      | GGGAGCGTCCCAAATCAATA     | CGCTGTACAAGAGACTGGAAA      |
| CDKN2B      | GTGGGAGAAGGCAGTGATTAG    | CTCCACTTTGTCCTCAGTCTTC     |
| XRCC2       | ACGCCTTCCTTATGCCATATAC   | GCCTATGTCCTGAATGGTACTG     |
| UCHL1       | GGGAGGGACTTTGCTGATTT     | CGTGTCTGCAGAACAGAAGAA      |
| ATG5        | CAACTGGGCTGGTCTTACTT     | GTGGTCCGGTAAGTCTTTCAT      |
| ATF4        | GGAGATAGGAAGCCAGACTACA   | GGCTCATAACAGATGCCACTATC    |
| TERT        | ACCTGCCGTCTTCACTTC       | GGGATGGACTATTCTATGTGG      |
| RANBP17     | GGATCCTGGATTGAGACGAA     | GTGCTTCCAGGCTCGTTCTA       |

**Supplementary Table 7.** Primer sequences for housekeeping genes.

| Target gene | Forward (5' to 3')        | Reverse (5' to 3')    |
|-------------|---------------------------|-----------------------|
| VIM         | ctttccggtgaagctgcta       | gaaggtgacgagccattcc   |
| RPLP2       | cagaggagaagaaagatgagaagaa | ctttattgcaggggagcag   |
| ACTG1L      | GGCTGAGTGTCTGGGATTT       | GGCCAAAGACATCAGCTAAGA |

# SUPPLEMENTARY DATA

**Supplementary Table 8.** Lysis buffer reagents.

| RIPA reagent<br>(Company)            | Concentration               | Inhibitors<br>(company)                                     | Concentration |
|--------------------------------------|-----------------------------|-------------------------------------------------------------|---------------|
| Tris pH 7.2<br>(T3253, Sigma)        | 20mM                        | AEBSG<br>(A1421.0100, VWR)                                  | 1mM           |
| NaCl<br>(424295000, Acros Organics)  | 150mM                       | Pepstatin A<br>(A2205.0010, VWR)                            | 1ug/ml        |
| Triton X-100<br>(T9284, Sigma)       | 1.0%                        | Leupeptin<br>(SC-215242, Santa Cruz)                        | 10ug/ml       |
| EDTA pH8<br>(T9284, E5134)           | 5mM                         | Aprotinin<br>(14716, Cambridge Bioscience)                  | 10ug/ml       |
| Deoxycholate<br>(D6750, Sigma)       | 1%                          | Ser/Thr phosphatase inhibitor Cocktail #3<br>(P0044, Sigma) | 1:100         |
| 10% SDS<br>(L4390, Sigma)            | 0.1%                        |                                                             |               |
| ddH <sub>2</sub> O<br>(w4502, Sigma) | Top up to desired<br>volume |                                                             |               |

**Supplementary Table 9.** Primary antibodies used for detection of proteins.

| Antibody<br>(All cell signalling, UK)                             | Dilution | Function                                                                                                                                                                                                                                                                                                                                                                  |
|-------------------------------------------------------------------|----------|---------------------------------------------------------------------------------------------------------------------------------------------------------------------------------------------------------------------------------------------------------------------------------------------------------------------------------------------------------------------------|
| <b>Akt (pan) (40D4)</b><br>(Mouse / 2920BC)                       | 1:500    | Part of conserved master age-regulating pathway; turned on by insulin, insulin-like hormone and insulin-like growth factors. Upon activation predominantly induces anabolic, synthetic and growth systems, and three of its targets mTOR, GSK3 $\beta$ (glycogen synthase kinase 3 $\beta$ ) and FOXO ((Forkhead box-O class) transcription factors) are central to this. |
| Phospho-Akt (Ser473) (D9E)<br>XP®<br>(Rabbit / 4060BC)            | 1:500    | Activated AKT – function as above                                                                                                                                                                                                                                                                                                                                         |
| <b>AMPKAlpha (F6)</b><br>(Mouse / 2793BC)                         | 1:500    | AMP-activated protein kinase (AMPK) is a crucial cellular fuel sensor controlling fatty acid oxidation, mitochondrial biogenesis and insulin sensitivity. Reduced AMPK function is linked to ageing processes.                                                                                                                                                            |
| Phospho-AMPKAlpha (Thr172)<br>(40H9)<br>(Rabbit / 2535BC)         | 1:500    | Activated AMPK – function as above                                                                                                                                                                                                                                                                                                                                        |
| <b>NF-KappaB p65 (D14E12) XP®</b><br>(Rabbit / 8242BC)            | 1:500    | The IKK/NF- $\kappa$ B signalling pathway has been proposed to be one of the key mediators of ageing; it is activated by genotoxic, oxidative, and inflammatory stresses and regulates expression of cytokines, growth factors, and genes that regulate apoptosis, cell cycle progression, cell senescence, and inflammation.                                             |
| Phospho-NF-KappaB p65<br>(Ser536) (7F1)<br>(Mouse / 3036BC)       | 1:500    | Activated NF-KappaB p65 - function as above                                                                                                                                                                                                                                                                                                                               |
| <b>S6 Ribosomal Protein (54D2)</b><br>(Mouse / 2317BC)            | 1:500    | Ribosomal S6 protein is a kinase and key component of the nutrient-responsive mTOR (mammalian target of rapamycin) signalling pathway that regulates cell growth and protein synthesis. Knockdown of this protein extends lifespan.                                                                                                                                       |
| Phospho-S6 Ribosomal Protein<br>(Ser235/236)<br>(Rabbit / 2211BC) | 1:500    | Activated S6 – function above                                                                                                                                                                                                                                                                                                                                             |
| <b>Sirt1 (1F3)</b><br>(Mouse / 8469BC)                            | 1:500    | A key protein deacetylase, dependent on nicotinamide adenine dinucleotide (NAD) as a cofactor; upon activation helps extend lifespan across multiple species. Sirtuins deacetylate a wide range of histone and non-histone targets, and influence multiple aspects of cellular and organismal physiology and pathology                                                    |
| Phospho-Sirt1 (Ser27)<br>(Rabbit / 2327BC)                        | 1:500    | Activated SIRT1 – function above                                                                                                                                                                                                                                                                                                                                          |

# SUPPLEMENTARY DATA

**Supplementary Table 10.** Primer sequences for target genes revealed by microarray study.

| Target gene | Forward (5' to 3')      | Reverse (5' to 3')      |
|-------------|-------------------------|-------------------------|
| ANXA2       | TACTTTGTGGCCCTGCTTTC    | TCCCAGAGCTTTCTTCCTACA   |
| CDK14       | GCATGAAACCTAGCTCCTCTAC  | GCACTCACTCATTCTCTCCTTC  |
| IGFRL1      | GCTGGAAGAGCTGATTGTACT   | GCAGGCAGCCCATATCTT      |
| ZNF264      | GTCTGTGTCTTCCTTCCAATC   | CAGCAGGAACCATCTCATTCA   |
| ENDOG       | ACCAGAATGCCTGGAACAA     | GCCCTGTGCAGACATAGAC     |
| PDCD10      | TGAATGAGGATGACAATGGAAGA | ACACAGGATACATGACTGCATAG |
| SDCCAG3     | TGTTGATCGCAAGAGTCCAG    | CCAAGAAGGGCTGCATAGAA    |
| RNF126      | CTCTGTCTAACCTCACCCTCTA  | GCTCAAACGTCCGTTTATTTC   |
| ZFP91       | GGCTGGGAGAGAGAGATTAGA   | GCCACTGGAGAGCTATGATTT   |
| COX5A       | GCAGGACCTCATAAGGAAATCT  | CCATGCGGTTTACACTTTGTC   |
| CS          | CTGGCACCCAATGTTTGATTT   | GTCTGGGAGGAGGTGAGTATTA  |
| WDR81       | GAATCACCAGAGCCACCAA     | CTTCCTCCTGCTCTTAACTCC   |
| OAT         | ACCCATGGCGACATTATCAG    | GGCTACCCTCAGAAAGACAAG   |
| RFN135      | GGGAAGTGGACACTAGGAATTG  | CCACACAACAAGAGTCCATAGT  |
| ATXN10      | GTCTTGTCACTGAGCCCTATC   | ACTTCTGGGATGAACTGGAAC   |
| FBX011      | caatggctggagtctggatt    | ctgacccccattaaatataca   |
| SEM4A       | GTCAGCCTTGGCCTCTTATT    | CCAACCTCCATCCTGCACTATC  |



# SUPPLEMENTARY DATA

## Supplementary Methods

### **ReNeuron's HPC0A07/03C cells with *c*-mycER<sup>TAM</sup> technology**

Owing to the genetically engineered *c*-mycER<sup>TAM</sup> technology, in the presence of growth factors (4-OHT, FGF2 and EGF), HPC0A07/03C cells will proliferate indefinitely. Removal of these factors induces differentiation into hippocampal neurons, astrocytes and oligodendrocytes, but not into other cell types outside of the brain. For further information pertaining to both the generation of the genetic construct and the obtainment of foetal-brain tissue, please see Pollock et al., 2006.

### **Automated quantification of immunofluorescence**

An automated approach was employed to quantifying cell number and markers of proliferation, differentiation and cell death using the CellInsight\* NXT High Content Screening (HCS) Platform (ThermoScientific).

The development of specific paradigms for our assays and cellular markers was based on two BioApplications available within the Cell Insight machine software package: (1) Target Activation enabled quantification of nuclear markers (BrdU, Ki67, Sox2 and H2A.X) and (2) Cell Health Profiling enabled quantification of markers expressed in the cell body and dendrites quantify (Nestin, CC3, S100B, DCX and Map2). Target activation facilitates the assessment of co-labelling within the region of the nucleus, as such, only staining confined within nuclear perimeter as stipulated by DAPI staining is quantified. In contrast, cell health profiling relies upon nuclear staining to aid construction of a concentric circle around the immediate vicinity of the nucleus (i.e., around most of the cell body). The creation of such a circle creates a map or region of interest. Staining confined within the region between the outer circle (edge of cell body) and inner circle (outside of the nucleus) is deemed positive.

### **Total RNA extraction and quantification of concentration and purity**

Cells seeded at a density of  $3 \times 10^5$  in 6-well plates (Nunc, Denmark) and treated with young and old human serum were harvested and pelleted at 6 hour and 6-day time points during the differentiation assay (Supp. Figure 7). First, supernatant was completely aspirated, and the cells were immediately lysed by scraping and resuspension in 1ml of TRIreagent® (T9424, Sigma) and stored at  $-80^{\circ}\text{C}$  until further use.

2ml sized Phase Lock Gel Heavy (2302830, 5 Prime) tubes were pre-spun at 13000rpm for 2 minutes and entire contents of thawed samples (1ml of re-suspended cells in TRIreagent) were transferred into these tubes. Chloroform is then added at a 5:1 ratio, in this case 200 $\mu\text{l}$ , to the tubes and mixed by vigorous shaking for 5-10 seconds. The mix is left at room temperature for 3 minutes where the layers start to separate out with a translucent layer containing RNA on the top. After centrifugation at 10,000 rpm for 5 minutes at  $4^{\circ}\text{C}$ , the aqueous top layer is collected into a new Eppendorf tube, 500  $\mu\text{l}$  of isopropanol (2:1 ratio with chloroform) is added and mixed by inversion x10 times. This is left to stand at room temperature for 15 minutes whilst isopropanol precipitates out nucleic acids, 80-85% of precipitate contains RNA. After 15 minutes, samples are centrifuged at 13,000 rpm for 15 minutes at  $4^{\circ}\text{C}$ . The small glass-like looking pellet is carefully washed in 80% ethanol and spun down at 14,000 rpm for 5 minutes at  $4^{\circ}\text{C}$  before air drying of pellet (10-15 minutes). Pellet re-suspended by gentle flick mix in molecular grade  $\text{H}_2\text{O}$  (certified RNase free) for 15 minutes before adding 10 $\mu\text{l}$  of Sodium Acetate (R1181, Thermo Scientific) and 300 $\mu\text{l}$  of 100% ethanol, and is left at  $-80^{\circ}\text{C}$  for 30 minutes or overnight. When ready for use, samples were spun down at 13,000 rpm for 15 minutes at  $4^{\circ}\text{C}$  and wash pellet in 80% ethanol before complete air-drying pellet (15-20 minutes). Re-suspend in 22.5 $\mu\text{l}$  of  $\text{H}_2\text{O}$ , flick mix and leave on ice for 15 minutes before assessment of concentration and purity.

The concentration and purity of extracted nucleic acids was measured using the NanoDrop™ 1000 spectrophotometer (Thermo Scientific). The 260/280 and 260/230 absorbance ratios were used to assess the purity of RNA. A 260/280 ratio of  $>2.0$  was considered pure for RNA and a 260/230 ratio of  $>2.0$  was considered pure for RNA. To remove residual genomic DNA contamination, all RNA samples were treated with TURBO DNA-free™ (AM1907, Life Technologies).

# SUPPLEMENTARY DATA

## Reverse transcription

Complimentary DNA (cDNA) was synthesised using SuperScript® III Reverse Transcriptase (18080-044, Life Technologies). 1 µg of DNase-treated RNA was combined with 250 ng of random hexamers (N8080127, Life Technologies) and 1 mM dNTP mix (R0191, Thermo Scientific) made up to 13 µl with nuclease-free H<sub>2</sub>O (Sigma-Aldrich). The mix was incubated for 5 minutes at 65°C on a heated block to denature RNA secondary structure. It was then promptly placed on ice and incubated for 1 minute. The mix was then made up to 20 µl with the following reagents: 1x First Strand Buffer (Invitrogen), 5 mM Dithiothreitol (18080-044, Life Technologies), 40 units RNaseOUT™ (10777, Life Technologies), 200 units SuperScript® III Reverse Transcriptase (Invitrogen) and 3 µl of nuclease-free H<sub>2</sub>O (Sigma-Aldrich). Samples were incubated at 25°C for 5 minutes, 50°C for 1 hour (optimal temperature of Superscript® III), 55°C for 30 minutes (to remove any secondary structures) and finally 70 °C for 15 minutes to terminate the reaction. For qPCR applications, samples were diluted to a concentration of 1:30 and 1:40 in nuclease-free H<sub>2</sub>O.

## Amplification primer design and testing of PCR specificity

PCR primer pairs were designed to amplify an amplicon of approximately 100 base pairs. DNA sequences for genes of interest were obtained from the University of California, Santa Cruz, genome browser (<http://genome.ucsc.edu>) and primers designed using integrated DNA technology (IDT) software (<http://www.idtdna.com/primerquest/home/index>) (Supp. Table 6). They were designed to have minimal self-complementarity and no complementarity to the other primer and were tested for single-peak melt curves using uMelt software (<https://www.dna.utah.edu/umelt/umelt.html>). The nucleotide sequence was sent to IDT who synthesised the oligonucleotides. They were re-suspended in nuclease-free H<sub>2</sub>O to a stock concentration of 100 µM and used at a working concentration of 2 µM.

## Lysate collection

Supernatant was aspirated from cells in a six-well plate before washing in ice-cold x1 PBS. PBS was completely removed to not dilute protein yield and cells were lysed on ice in 100µl of freshly made radioimmunoprecipitation assay (RIPA) buffer supplemented with several protease and phosphatase inhibitors (Supp. Table 8). Cells were scraped rigorously, and the lysate was collected into fresh Eppendorf tubes which were then sonicated (x5 pulses) and left on ice for 15-30 minutes. Lysates were spun down at 15,000 rpm for 15 minutes at 4°C and the supernatant was collected into fresh tubes in preparation for protein concentration determination.

## Determining protein concentration

Protein concentration was determined using the BCA assay (23225, Pierce BioTechnology, USA) as per manufacturer's instructions.

## Preparing and loading samples

Samples were thawed on ice and denatured by mixing with laemmli X2 buffer (S3401, Sigma) at a 1:1 ratio and boiling at 95°C for 5 mins on heat block. 12-well Mini Protean TGX 4-20% precast gels (456109DC, Biorad) were assembled into a green and white western unit filled it up with cold X1 SDS Electrophoresis (Running) Buffer diluted in ddH<sub>2</sub>O from a X5 stock (15.1g Tris Base, 72g Glycine, 5g SDS, pH 8.4) and topped up with ddH<sub>2</sub>O to 1L. Green combs were carefully removed, and each well was washed with x1 running buffer using a syringe to remove any air bubbles. 10µl of the kaleidoscope ladder (161-0375, Biorad) and 25ug of sample were loaded into appropriate wells.

## Running gels and transferring to nitrocellulose membrane

The set-up involved first connecting the green and white plastic gel unit to an electrophoresis tank and filling this up with X1 running buffer until halfway up the tank. Gels were run at 100-120 V for 2 hours. Nitrocellulose membranes (77010, Life Technologies) were washed in X1 Western Transfer Buffer (WTB) containing 10% methanol diluted in ddH<sub>2</sub>O from a 10x stock (30.3g Trizma base, 151.6g Glycine, pH 8.5 and topped up with ddH<sub>2</sub>O to 1L). Membranes were further washed in ddH<sub>2</sub>O and gels were dislodged from their plate and left to equilibrate in X1 WTB. Transfer
